# Supplementary material
Source: PubMed Central journal article supplement (PMC5242375)

Fig2C

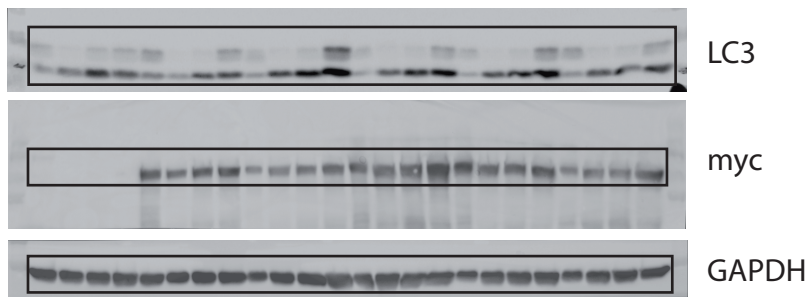

Supplement: EMBJ-36-135-s005.pdf [file EMBJ-36-135-s005.pdf]

Fig3D

p97

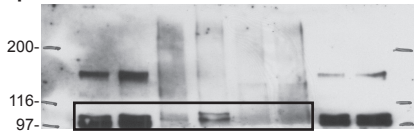

UBXD1

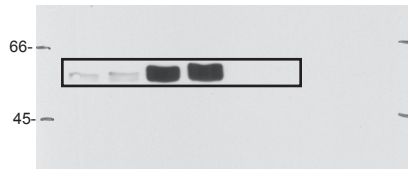

PLAA

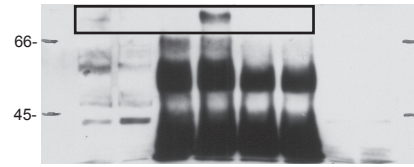

Fig3E

PLAA

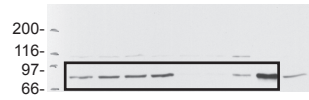

p97

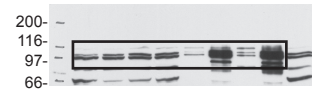

YOD1 (GFP-YOD1)

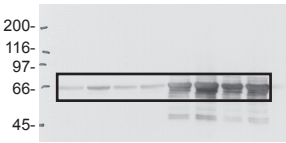

UBXD1

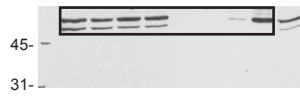

Fig3F

p97

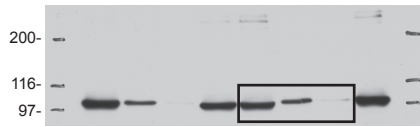

GFP (GFP-YOD1-CS)

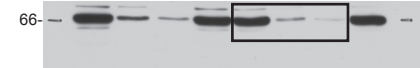

UFD1

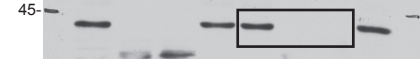

PLAA

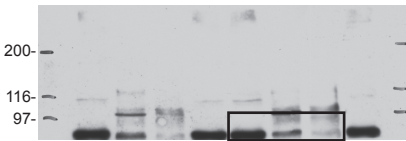

UBXD1

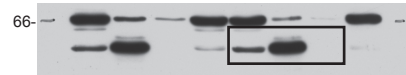

Supplement: EMBJ-36-135-s006.pdf [file EMBJ-36-135-s006.pdf]
